# Supplementary material for: Properties of Newly-Synthesized Cationic Semi-Interpenetrating Hydrogels Containing Either Hyaluronan or Chondroitin Sulfate in a Methacrylic Matrix
Source: J Funct Biomater. 2012 Mar 23;3(2):225–38. doi: 10.3390/jfb3020225 (PMC4047938; doi:10.3390/jfb3020225)
Supplement: Supplementary File 1 — DOC-Document (DOC, 29 KB) [file jfb-03-00225-s001.doc]

| **Biopolymer** | **Mw (kDa)** | **Mn (kDa)** | **Mw/Mn** | **[] (dL/g)** | **Rh (nm)** | **a** | **log k** |
| --- | --- | --- | --- | --- | --- | --- | --- |
| HA | 1300  40 | 980  20 | 1.4  0.1 | 21 1 | 70  1 | 0.60  0.01 | -2.75  0.05 |
| CS | 36  1 | 25  1 | 1.4  0.1 | 0.9  0.1 | 7.8  0.1 | 0.96 0.01 | -4.46 0.05 |

**Table 1** Values of weight average molar mass (Mw), numeric average molar mass (Mn), polydispersity index (Mw/Mn), intrinsic viscosity ([]), hydrodynamic radius (Rh) and Mark-Houwink constants “a” and “logk” for the biopolymers used in the synthesis of the semi-IPNs hydrogels as obtained by SEC-TDA analyses.
